# Supplementary material for: The nonlinear dynamics and fluctuations of mRNA levels in cell cycle coupled transcription
Source: PubMed Central journal article supplement (PMC6508750; doi:10.1371/journal.pcbi.1007017), 2019-04-29
Supplement: pcbi.1007017.s001.pdf [file pcbi.1007017.s001.pdf]

# SUPPORTING INFORMATION

## “The nonlinear dynamics and fluctuations of mRNA levels in cell cycle coupled transcription”

Qiwen Sun<sup>a,b</sup>, Feng Jiao<sup>a,b</sup>, Genghong Lin<sup>a,b</sup>, Jianshe Yu<sup>a</sup> and Moxun Tang<sup>b</sup>

<sup>a</sup> Center for Applied Mathematics, Guangzhou University, Guangzhou, 510006, China

<sup>b</sup> Department of Mathematics, Michigan State University, East Lansing, Michigan, 48824, USA

## 1 The derivation of differential equations

### 1.1 The derivation of the master equations

We present the technical steps leading to the master equations

$$\begin{aligned} P_1'(0, m, t) &= \gamma_1 P_1(1, m, t) - (m\delta_1 + \lambda_1 + \kappa_1) P_1(0, m, t) \\ &\quad + (m+1)\delta_1 P_1(0, m+1, t) + \kappa_2 \sum_{n=m}^{\infty} \left(\frac{1}{2}\right)^n \binom{n}{m} P_2(n, t), \end{aligned} \quad (1)$$

$$\begin{aligned} P_1'(1, m, t) &= \lambda_1 P_1(0, m, t) - (\nu_1 + m\delta_1 + \gamma_1 + \kappa_1) P_1(1, m, t) \\ &\quad + \nu_1 P_1(1, m-1, t) + (m+1)\delta_1 P_1(1, m+1, t), \end{aligned} \quad (2)$$

$$\begin{aligned} P_2'(0, m, t) &= \kappa_1 P_1(m, t) - (m\delta_2 + 2\lambda_2 + \kappa_2) P_2(0, m, t) \\ &\quad + (m+1)\delta_2 P_2(0, m+1, t) + \gamma_2 P_2(1, m, t), \end{aligned} \quad (3)$$

$$\begin{aligned} P_2'(1, m, t) &= 2\lambda_2 P_2(0, m, t) + 2\gamma_2 P_2(2, m, t) + (m+1)\delta_2 P_2(1, m+1, t) \\ &\quad + \nu_2 P_2(1, m-1, t) - (\nu_2 + m\delta_2 + \lambda_2 + \gamma_2 + \kappa_2) P_2(1, m, t), \end{aligned} \quad (4)$$

$$\begin{aligned} P_2'(2, m, t) &= \lambda_2 P_2(1, m, t) - (2\nu_2 + m\delta_2 + 2\gamma_2 + \kappa_2) P_2(2, m, t) \\ &\quad + 2\nu_2 P_2(2, m-1, t) + (m+1)\delta_2 P_2(2, m+1, t). \end{aligned} \quad (5)$$

In these equations, the time evolutions of the joint probabilities

$$P_1(i, m, t) = \text{Prob}\{I(t) = i, M(t) = m, U(t) = 1\}, \quad i = 0, 1; m = 0, 1, 2, \dots, \quad (6)$$

$$P_2(i, m, t) = \text{Prob}\{I(t) = i, M(t) = m, U(t) = 2\}, \quad i = 0, 1, 2; m = 0, 1, 2, \dots, \quad (7)$$

are expressed by linear combinations of related probabilities. We recall that  $I$ ,  $M$ , and  $U$  specify the promoter state, the mRNA copy number of the gene, and the cell cycle stage of a single cell in an isogenic cell population, respectively. Suppose that the gene is OFF and the cell resides on  $\mathbb{S}_1$  stage with  $m$  copies of mRNA molecules at time  $t+h$  for an infinitesimal time increment  $h > 0$ . Then the basic assumptions (i)-(v) imply that, by discarding the

|     | Initial State ( $t$ )         | Terminal State ( $t + h$ ) | Event Probability                                                       |
|-----|-------------------------------|----------------------------|-------------------------------------------------------------------------|
| (a) | (OFF, $\mathbb{S}_1, m$ )     | (OFF, $\mathbb{S}_1, m$ )  | $P_1(0, m, t) \cdot (1 - \lambda_1 h)(1 - \kappa_1 h)(1 - m\delta_1 h)$ |
| (b) | (ON, $\mathbb{S}_1, m$ )      | (OFF, $\mathbb{S}_1, m$ )  | $P_1(1, m, t) \cdot \gamma_1 h$                                         |
| (c) | (OFF, $\mathbb{S}_1, m + 1$ ) | (OFF, $\mathbb{S}_1, m$ )  | $P_1(0, m + 1, t) \cdot (m + 1)\delta_1 h$                              |
| (d) | (*, $\mathbb{S}_2, n$ )       | (OFF, $\mathbb{S}_1, m$ )  | $P_2(n, t) \cdot 2^{-n} \binom{n}{m} \cdot \kappa_2 h$                  |

Table 1: **The initial states and transition probabilities toward the terminal state** (OFF,  $\mathbb{S}_1, m$ ). If the gene is OFF, the cell is in  $\mathbb{S}_1$  stage with  $m$  copies of the mRNA molecules at  $t + h$ , then four initial states at time  $t$ , listed in (a), (b), (c), (d), can reach the terminal state with a transition probability of order 0 or 1 of the infinitesimal time increment  $h$ . In (d), the cell is divided within time interval  $(t, t + h)$ , and  $m$  transcripts are partitioned to one daughter cell from the  $n$  transcripts in the mother cell with a probability  $2^{-n} \binom{n}{m}$ .  $P_2(n, t) = P_2(0, n, t) + P_2(1, n, t) + P_2(2, n, t)$  is the probability that the cell resides on  $\mathbb{S}_2$  stage with  $n$  transcripts.

events with transition probabilities of second or higher order of  $h$ , one of the state transition events in Table 1 must occur during the time interval  $(t, t + h)$ .

Adding the four probabilities listed in Table 1 gives

$$\begin{aligned}
P_1(0, m, t + h) = & P_1(0, m, t)(1 - \lambda_1 h)(1 - \kappa_1 h)(1 - m\delta_1 h) + P_1(1, m, t)\gamma_1 h \\
& + P_1(0, m + 1, t)(m + 1)\delta_1 h + \sum_{n=m}^{\infty} P_2(n, t) \left(\frac{1}{2}\right)^n \binom{n}{m} \kappa_2 h,
\end{aligned}$$

which can be re-organized as

$$\begin{aligned}
\frac{P_1(0, m, t + h) - P_1(0, m, t)}{h} = & - (m\delta_1 + \lambda_1 + \kappa_1)P_1(0, m, t) + o(h) + \gamma_1 P_1(1, m, t) \\
& + (m + 1)\delta_1 P_1(0, m + 1, t) + \kappa_2 \sum_{n=m}^{\infty} \left(\frac{1}{2}\right)^n \binom{n}{m} P_2(n, t),
\end{aligned}$$

where  $o(h) \rightarrow 0$  as  $h \rightarrow 0$ . By letting  $h \rightarrow 0$ , we obtain

$$\begin{aligned}
P_1'(0, m, t) = & \gamma_1 P_1(1, m, t) - (m\delta_1 + \lambda_1 + \kappa_1)P_1(0, m, t) \\
& + (m + 1)\delta_1 P_1(0, m + 1, t) + \kappa_2 \sum_{n=m}^{\infty} \left(\frac{1}{2}\right)^n \binom{n}{m} P_2(n, t),
\end{aligned}$$

which verifies (6) in the main context. The remaining equations can be verified by the same procedure whose details are omitted for simplicity.

## 1.2 The derivation of the differential equations of $n_1(t)$ and $n_2(t)$

As shown in the main context, the mean transcription level  $m(t)$  in cells has a decomposition  $m(t) = n_1(t) + n_2(t)$  with

$$n_1(t) = \sum_{k=0}^{\infty} k P_1(k, t), \quad \text{and} \quad n_2(t) = \sum_{k=0}^{\infty} k P_2(k, t), \quad (8)$$

We present here the process leading to the system of differential equations

$$\begin{cases} n_1'(t) = -(\delta_1 + \kappa_1)n_1(t) + \frac{\kappa_2}{2}n_2(t) + \nu_1 P_{11}(t), \\ n_2'(t) = \kappa_1 n_1(t) - (\delta_2 + \kappa_2)n_2(t) + \nu_2 [P_{21}(t) + 2P_{22}(t)]. \end{cases} \quad (9)$$

By using the definition

$$P_1(m, t) = P_1(0, m, t) + P_1(1, m, t), \quad P_2(m, t) = P_2(0, m, t) + P_2(1, m, t) + P_2(2, m, t)$$

we can express  $P_1(k, t)$  and  $P_2(k, t)$  in (8) as the sums of the basic probabilities defined in (6)-(7). By differentiating  $n_1(t)$  in (8), and then substituting (1)-(2), we have

$$\begin{aligned} n_1'(t) = \sum_{m=0}^{\infty} m & \left[ \underbrace{\nu_1 P_1(1, m-1, t) - \nu_1 P_1(1, m, t)}_{\text{First term}} + \underbrace{(m+1)\delta_1 P_1(m+1, t) - m\delta_1 P_1(m, t)}_{\text{Second term}} \right. \\ & \left. - \underbrace{\kappa_1 P_1(m, t)}_{\text{Third term}} + \underbrace{\kappa_2 \sum_{n=m}^{\infty} \left(\frac{1}{2}\right)^n \binom{n}{m} P_2(n, t)}_{\text{Forth term}} \right]. \end{aligned}$$

By using the definitions of  $P_{11}(t)$ ,  $n_1(t)$  and  $n_2(t)$ , we can simplify the sums of these terms multiplying  $m$  as follows. For the first, we have

$$\nu_1 \sum_{m=0}^{\infty} m [P_1(1, m-1, t) - P_1(1, m, t)] = \nu_1 \sum_{m=0}^{\infty} P_1(1, m, t) = \nu_1 P_{11}(t).$$

The second sum is

$$\delta_1 \sum_{m=0}^{\infty} [m(m+1)P_1(m+1, t) - m^2 P_1(m, t)] = -\delta_1 \sum_{m=0}^{\infty} m P_1(m, t) = -\delta_1 n_1(t),$$

and the third sum is simply  $\kappa_1 n_1(t)$ . Finally, for the last one,

$$\begin{aligned} \kappa_2 \sum_{m=0}^{\infty} m \sum_{n=m}^{\infty} \left(\frac{1}{2}\right)^n \binom{n}{m} P_2(n, t) &= \kappa_2 \sum_{n=0}^{\infty} \left(\frac{1}{2}\right)^n P_2(n, t) \sum_{m=0}^n m \binom{n}{m} \\ &= \kappa_2 \sum_{n=0}^{\infty} \left(\frac{1}{2}\right)^n P_2(n, t) \cdot \frac{n \cdot 2^n}{2} = \frac{\kappa_2}{2} \sum_{n=0}^{\infty} n P_2(n, t) = \frac{\kappa_2}{2} n_2(t). \end{aligned}$$

We the help of these simplification, we verify the first equation of (9). The second equation of (9) can be obtained by a similar calculation.

### 1.3 The derivation of the differential equations of $\omega_1(t)$ and $\omega_2(t)$

The second moment  $\mu(t) = \mathbf{E}[M^2(t)]$  of the mRNA copy number  $M(t)$  has a decomposition  $\mu(t) = \omega_1(t) + \omega_2(t)$  with

$$\omega_1(t) = \sum_{k=0}^{\infty} k^2 P_1(k, t), \quad \text{and} \quad \omega_2(t) = \sum_{k=0}^{\infty} k^2 P_2(k, t). \quad (10)$$

Here we give a brief discussion on the process of deriving the system

$$\begin{cases} \omega_1'(t) = - (2\delta_1 + \kappa_1)\omega_1(t) + \frac{\kappa_2}{4}\omega_2(t) \\ \quad + \delta_1 n_1(t) + \frac{\kappa_2}{4}n_2(t) + \nu_1 [2n_{11}(t) + P_{11}(t)], \\ \omega_2'(t) = \kappa_1\omega_1(t) - (2\delta_2 + \kappa_2)\omega_2(t) + \delta_2 n_2(t) \\ \quad + \nu_2 [P_{21}(t) + 2P_{22}(t) + 2n_{21}(t) + 4n_{22}(t)], \end{cases} \quad (11)$$

where

$$n_{1i}(t) = \sum_{m=0}^{\infty} m P_1(i, m, t), \quad i = 0, 1, \quad n_{2i}(t) = \sum_{m=0}^{\infty} m P_2(i, m, t), \quad i = 0, 1, 2, \quad (12)$$

and

$$n_1(t) = n_{10}(t) + n_{11}(t), \quad n_2(t) = n_{20}(t) + n_{21}(t) + n_{22}(t).$$

After expressing  $P_1(k, t)$  and  $P_2(k, t)$  in (10) as the sums of the basic probabilities defined in (6)-(7), we differentiate  $\omega_1(t)$  in (10). Then substituting the master equations (1) and (2) gives

$$\begin{aligned} \omega_1'(t) &= \sum_{m=0}^{\infty} m^2 P_1'(m, t) = \sum_{m=0}^{\infty} m^2 [P_1'(0, m, t) + P_1'(1, m, t)] \\ &= \sum_{m=0}^{\infty} m^2 \left[ \underbrace{\nu_1 P_1(1, m-1, t) - \nu_1 P_1(1, m, t)}_{\text{First term}} + \underbrace{(m+1)\delta_1 P_1(m+1, t) - m\delta_1 P_1(m, t)}_{\text{Second term}} \right. \\ &\quad \left. - \underbrace{\kappa_1 P_1(m, t)}_{\text{Third term}} + \underbrace{\kappa_2 \sum_{n=m}^{\infty} \left(\frac{1}{2}\right)^n \binom{n}{m} P_2(n, t)}_{\text{Forth term}} \right]. \end{aligned}$$

The first two sums can be simplified as

$$\begin{aligned} \nu_1 \sum_{m=0}^{\infty} m^2 [P_1(1, m-1, t) - P_1(1, m, t)] &= \nu_1 \sum_{m=0}^{\infty} (2m+1) P_1(1, m, t) = 2\nu_1 n_{11}(t) + \nu_1 P_{11}(t), \\ \delta_1 \sum_{m=0}^{\infty} [m^2(m+1)P_1(m+1, t) - m^3 P_1(m, t)] &= \delta_1 \sum_{m=0}^{\infty} (-2m^2 + m) P_1(m, t) = \delta_1 n_1(t) - 2\delta_1 \omega_1(t). \end{aligned}$$

The third sum is simply  $\kappa_1 \omega_1(t)$ , and the last one is

$$\begin{aligned} \kappa_2 \sum_{m=0}^{\infty} m^2 \cdot \sum_{n=m}^{\infty} \left(\frac{1}{2}\right)^n \binom{n}{m} P_2(n, t) &= \kappa_2 \sum_{n=0}^{\infty} \left(\frac{1}{2}\right)^n P_2(n, t) \sum_{m=0}^n m^2 \binom{n}{m} \\ &= \kappa_2 \sum_{n=0}^{\infty} \left(\frac{1}{2}\right)^n P_2(n, t) \cdot \frac{2^n(n^2 + n)}{4} = \frac{\kappa_2}{4} [\omega_2(t) + n_2(t)]. \end{aligned}$$

By putting these simplifications together, we verify the first equation of (11). The second equation can be verified by a similar procedure.

## 2 The proof of Theorems

We give mathematical proofs of Theorems 1-4 stated in the main context. For convenience, we restate these theorems before giving their proofs.

### 2.1 The proof of Theorem 1

**Theorem 1** *If the transcription of a gene obeys the model described in Figure 1, then the mean transcription level of the gene in a population of isogenic cells at steady-state is*

$$m^* = m_1^* \cdot \frac{\kappa_2}{\kappa_1 + \kappa_2} + m_2^* \cdot \frac{\kappa_1}{\kappa_1 + \kappa_2}, \quad (13)$$

a linear combination of the mean levels  $m_1^*$  in  $\mathbb{S}_1$  stage and  $m_2^*$  in  $\mathbb{S}_2$  stage, and

$$m_1^* = \frac{2\nu_1\lambda_1(\delta_2 + \kappa_2)(\lambda_2 + \gamma_2 + \kappa_2) + 2\nu_2\lambda_2\kappa_1(\lambda_1 + \gamma_1 + \kappa_1)}{[2(\delta_1 + \kappa_1)(\delta_2 + \kappa_2) - \kappa_1\kappa_2](\lambda_1 + \gamma_1 + \kappa_1)(\lambda_2 + \gamma_2 + \kappa_2)}, \quad (14)$$

$$m_2^* = \frac{2\nu_1\lambda_1\kappa_2(\lambda_2 + \gamma_2 + \kappa_2) + 4\nu_2\lambda_2(\delta_1 + \kappa_1)(\lambda_1 + \gamma_1 + \kappa_1)}{[2(\delta_1 + \kappa_1)(\delta_2 + \kappa_2) - \kappa_1\kappa_2](\lambda_1 + \gamma_1 + \kappa_1)(\lambda_2 + \gamma_2 + \kappa_2)}. \quad (15)$$

**Proof** By the decomposition

$$m(t) = n_1(t) + n_2(t) = P_1(t)m_1(t) + P_2(t)m_2(t),$$

we get  $m^* = P_1^*m_1^* + P_2^*m_2^*$ . From the analytical form

$$P_1(t) = \frac{\kappa_2}{\kappa_1 + \kappa_2} + \frac{\kappa_1}{\kappa_1 + \kappa_2} e^{-(\kappa_1 + \kappa_2)t}$$

derived in the main context, and  $P_2(t) = 1 - P_1(t)$ , it follows immediately that

$$P_1^* = \frac{\kappa_2}{\kappa_1 + \kappa_2} \quad \text{and} \quad P_2^* = \frac{\kappa_1}{\kappa_1 + \kappa_2}. \quad (16)$$

This verifies (13).

It remains to verify (14) and (15). Recall from the main text the definition

$$P_1(t) = P_{10}(t) + P_{11}(t), \quad P_2(t) = P_{20}(t) + P_{21}(t) + P_{22}(t), \quad (17)$$

and the closed system of  $P_{1i}(t)$  and  $P_{2i}(t)$ ,

$$\begin{cases} P'_{10}(t) = \kappa_2 P_2(t) + \gamma_1 P_{11}(t) - (\lambda_1 + \kappa_1) P_{10}(t), \\ P'_{11}(t) = \lambda_1 P_{10}(t) - (\gamma_1 + \kappa_1) P_{11}(t), \\ P'_{20}(t) = \kappa_1 P_1(t) + \gamma_2 P_{21}(t) - (2\lambda_2 + \kappa_2) P_{20}(t), \\ P'_{21}(t) = 2\lambda_2 P_{20}(t) - (\lambda_2 + \gamma_2 + \kappa_2) P_{21}(t) + 2\gamma_2 P_{22}(t), \\ P'_{22}(t) = \lambda_2 P_{21}(t) - (2\gamma_2 + \kappa_2) P_{22}(t). \end{cases} \quad (18)$$

From  $P_1(t) = P_{10}(t) + P_{11}(t)$  in (17) and the second equation in (18), we find  $P_{10}^* + P_{11}^* = P_1^*$ ,  $\lambda_1 P_{10}^* - (\gamma_1 + \kappa_1) P_{11}^* = 0$ , and therefore

$$P_{11}^* = \frac{\lambda_1 \kappa_2}{(\lambda_1 + \gamma_1 + \kappa_1)(\kappa_1 + \kappa_2)}. \quad (19)$$

By taking limit in (17), in the third and the fourth equations in (18), we derive

$$\begin{aligned} P_{20}^* + P_{21}^* + P_{22}^* &= P_2^*, \\ (2\lambda_2 + \kappa_2)P_{20}^* - \gamma_2 P_{21}^* &= \kappa_1 P_1^*, \\ 2\lambda_2 P_{20}^* - (\lambda_2 + \gamma_2 + \kappa_2)P_{21}^* + 2\gamma_2 P_{22}^* &= 0. \end{aligned} \quad (20)$$

As  $P_1^*$  and  $P_2^*$  are given in (16), we can solve this linear system to obtain  $P_{20}^*$ ,  $P_{21}^*$ , and  $P_{22}^*$ , from which it follows that

$$P_{21}^* + 2P_{22}^* = \frac{2\lambda_2\kappa_1}{(\lambda_2 + \gamma_2 + \kappa_2)(\kappa_1 + \kappa_2)}. \quad (21)$$

From (9), we find that the steady-states of  $n_1(t)$  and  $n_2(t)$  satisfy

$$(\delta_1 + \kappa_1)n_1^* - \frac{\kappa_2}{2}n_2^* = \nu_1 P_{11}^* \quad \text{and} \quad \kappa_1 n_1^* - (\delta_2 + \kappa_2)n_2^* = -\nu_2 (P_{21}^* + 2P_{22}^*). \quad (22)$$

Thus,  $n_1^*$  and  $n_2^*$  can be determined by  $P_{11}^*$  and  $P_{21}^* + 2P_{22}^*$  as

$$n_1^* = \frac{2\nu_1(\delta_2 + \kappa_2)P_{11}^* + \nu_2\kappa_2(P_{21}^* + 2P_{22}^*)}{2(\delta_1 + \kappa_1)(\delta_2 + \kappa_2) - \kappa_1\kappa_2}, \quad n_2^* = \frac{2\nu_1\kappa_1 P_{11}^* + 2\nu_2(\delta_1 + \kappa_1)(P_{21}^* + 2P_{22}^*)}{2(\delta_1 + \kappa_1)(\delta_2 + \kappa_2) - \kappa_1\kappa_2}. \quad (23)$$

The final expressions of  $n_1^*$  and  $n_2^*$  in terms of the system parameters can be obtained by substituting (19) and (21) into (23). The expressions (14) and (15) are then derived from the relations  $n_1^* = P_1^* m_1^*$  and  $n_2^* = P_2^* m_2^*$ .  $\square$

## 2.2 The proof of Theorem 2

**Theorem 2** *If the transcription of a gene obeys the model described in Figure 1, then the second moment of its mRNA copy number  $M(t)$  at steady-state is*

$$\mu^* = \mu_1^* \cdot \frac{\kappa_2}{\kappa_1 + \kappa_2} + \mu_2^* \cdot \frac{\kappa_1}{\kappa_1 + \kappa_2}, \quad (24)$$

where  $\mu_1^*$  and  $\mu_2^*$  are the second moments in  $\mathbb{S}_1$  and  $\mathbb{S}_2$  stages given by

$$\mu_1^* = m_1^* + \frac{8\nu_1(\kappa_2 + 2\delta_2) \cdot m_{s1}^* + 2\nu_2\kappa_1 \cdot m_{s2}^*}{4(\kappa_1 + 2\delta_1)(\kappa_2 + 2\delta_2) - \kappa_1\kappa_2}, \quad (25)$$

$$\mu_2^* = m_2^* + \frac{8\nu_1\kappa_2 \cdot m_{s1}^* + 8\nu_2(\kappa_1 + 2\delta_1) \cdot m_{s2}^*}{4(\kappa_1 + 2\delta_1)(\kappa_2 + 2\delta_2) - \kappa_1\kappa_2}, \quad (26)$$

with

$$m_{s1}^* = \frac{(\delta_1 + \lambda_1 + \kappa_1)m_1^* - \kappa_1 m_2^*/2}{\delta_1 + \lambda_1 + \gamma_1 + \kappa_1}, \quad m_{s2}^* = \frac{(\delta_2 + \kappa_2 + 2\lambda_2)m_2^* - \kappa_2 m_1^* + 2\nu_2 p_{22}^*}{\delta_2 + \lambda_2 + \gamma_2 + \kappa_2}, \quad (27)$$

and  $p_{22}^* = 2\lambda_2^2 / [(\kappa_2 + \lambda_2 + \gamma_2)(\kappa_2 + 2\lambda_2 + 2\gamma_2)]$ .

**Proof** In view of  $P_1^*$  and  $P_2^*$  given in (16), it is clear that (24) follows from the decomposition

$$\mu(t) = \omega_1(t) + \omega_2(t) = P_1(t)\mu_1(t) + P_2(t)\mu_2(t).$$

It remains to verify (25) and (26). Recall the following system of  $n_{1i}(t)$  and  $n_{2i}(t)$ :

$$\begin{cases} n'_{10}(t) = \frac{\kappa_2}{2}n_2(t) - (\delta_1 + \lambda_1 + \kappa_1)n_{10}(t) + \gamma_1n_{11}(t), \\ n'_{11}(t) = \lambda_1n_{10}(t) + \nu_1P_{11}(t) - (\delta_1 + \gamma_1 + \kappa_1)n_{11}(t), \\ n'_{20}(t) = \kappa_1n_1(t) + \gamma_2n_{21}(t) - (\delta_2 + 2\lambda_2 + \kappa_2)n_{20}(t), \\ n'_{21}(t) = 2\lambda_2n_{20}(t) + 2\gamma_2n_{22}(t) + \nu_2P_{21}(t) - (\delta_2 + \lambda_2 + \gamma_2 + \kappa_2)n_{21}(t), \\ n'_{22}(t) = \lambda_2n_{21}(t) + 2\nu_2P_{22}(t) - (\delta_2 + 2\gamma_2 + \kappa_2)n_{22}(t), \end{cases} \quad (28)$$

From the definition of  $n_1(t)$  in (8) and the first equation in (28), we find

$$n_{10}^* + n_{11}^* = n_1^*, \quad (\delta_1 + \lambda_1 + \kappa_1)n_{10}^* - \gamma_1n_{11}^* = \frac{\kappa_2}{2}n_2^*,$$

and therefore

$$n_{11}^* = \frac{2(\delta_1 + \lambda_1 + \kappa_1)n_1^* - \kappa_2n_2^*}{2(\delta_1 + \lambda_1 + \gamma_1 + \kappa_1)}. \quad (29)$$

By taking limit in (8), the third and the last equations in (28), we derive

$$\begin{aligned} n_{20}^* + n_{21}^* + n_{22}^* &= n_2^*, \\ (\delta_2 + 2\lambda_2 + \kappa_2)n_{20}^* - \gamma_2n_{21}^* &= \kappa_1n_1^*, \\ \lambda_2n_{21}^* - (\delta_2 + 2\gamma_2 + \kappa_2)n_{22}^* &= -2\nu_2P_{22}^*. \end{aligned}$$

We can solve this linear system to express  $n_{20}^*$ ,  $n_{21}^*$  and  $n_{22}^*$  as functions of  $n_1^*$ ,  $n_2^*$ , and  $P_{22}^*$ , from which it follows that

$$n_{21}^* + 2n_{22}^* = \frac{(\delta_2 + 2\lambda_2 + \kappa_2)n_2^* - \kappa_1n_1^* + 2\nu_2P_{22}^*}{\delta_2 + \lambda_2 + \gamma_2 + \kappa_2}, \quad (30)$$

where  $n_1^*$  and  $n_2^*$  are given explicitly in (23), and by solving the linear system (20),

$$P_{22}^* = \frac{2\lambda_2^2\kappa_1}{(\kappa_2 + \lambda_2 + \gamma_2)(\kappa_2 + 2\lambda_2 + 2\gamma_2)(\kappa_1 + \kappa_2)}. \quad (31)$$

From (11), we find that the steady-states of  $\omega_1(t)$  and  $\omega_2(t)$  satisfy

$$\begin{aligned} (2\delta_1 + \kappa_1)\omega_1^* - \frac{\kappa_2}{4}\omega_2^* &= \delta_1n_1^* + \frac{\kappa_2}{4}n_2^* + \nu_1[2n_{11}^* + P_{11}^*], \\ -\kappa_1\omega_1^* + (2\delta_2 + \kappa_2)\omega_2^* &= \delta_2n_2^* + \nu_2[P_{21}^* + 2P_{22}^* + 2n_{21}^* + 4n_{22}^*]. \end{aligned}$$

Thus,  $\omega_1^*$  and  $\omega_2^*$  can be expressed as functions of  $n_1^*$ ,  $n_2^*$ ,  $P_{11}^*$ ,  $P_{21}^* + 2P_{22}^*$ ,  $n_{11}^*$ , and  $n_{21}^* + 2n_{22}^*$ . By using (22), we can express  $P_{11}^*$  and  $P_{21}^* + 2P_{22}^*$  as linear combinations of  $n_1^*$  and  $n_2^*$ , and

$$\omega_1^* = n_1^* + \frac{8\nu_1(\kappa_2 + 2\delta_2)n_{11}^* + 2\nu_2\kappa_2(n_{21}^* + 2n_{22}^*)}{4(\kappa_1 + 2\delta_1)(\kappa_2 + 2\delta_2) - \kappa_1\kappa_2}, \quad (32)$$

$$\omega_2^* = n_2^* + \frac{8\nu_1\kappa_1n_{11}^* + 8\nu_2(\kappa_1 + 2\delta_1)(n_{21}^* + 2n_{22}^*)}{4(\kappa_1 + 2\delta_1)(\kappa_2 + 2\delta_2) - \kappa_1\kappa_2}. \quad (33)$$

By introducing

$$m_{s1}^* = \frac{n_{11}^*}{P_1^*} \quad \text{and} \quad m_{s2}^* = \frac{n_{21}^* + 2n_{22}^*}{P_2^*}, \quad (34)$$

and dividing (32) and (33) by  $P_1^*$  and  $P_2^*$  respectively, we derive

$$\begin{aligned}\mu_1^* &= \frac{\omega_1^*}{P_1^*} = m_1^* + \frac{8\nu_1(\kappa_2 + 2\delta_2)m_{s1}^* + 2\nu_2m_{s2}^* \cdot \kappa_2P_2^*/P_1^*}{4(\kappa_1 + 2\delta_1)(\kappa_2 + 2\delta_2) - \kappa_1\kappa_2}, \\ \mu_2^* &= \frac{\omega_2^*}{P_2^*} = m_2^* + \frac{8\nu_1m_{s1}^* \cdot \kappa_1P_1^*/P_2^* + 8\nu_2(\kappa_1 + 2\delta_1)m_{s2}^*}{4(\kappa_1 + 2\delta_1)(\kappa_2 + 2\delta_2) - \kappa_1\kappa_2},\end{aligned}$$

from which (25) and (26) follow immediately because (16) implies

$$\kappa_2P_2^*/P_1^* = \kappa_1 \quad \text{and} \quad \kappa_1P_1^*/P_2^* = \kappa_2.$$

From (29) we find

$$\begin{aligned}m_{s1}^* &= \frac{2(\delta_1 + \lambda_1 + \kappa_1)n_1^*/P_1^* - \kappa_2n_2^*/P_1^*}{2(\delta_1 + \lambda_1 + \gamma_1 + \kappa_1)} \\ &= \frac{2(\delta_1 + \lambda_1 + \kappa_1)m_1^* - \kappa_2P_2^*/P_1^* \cdot m_2^*}{2(\delta_1 + \lambda_1 + \gamma_1 + \kappa_1)} \\ &= \frac{2(\delta_1 + \lambda_1 + \kappa_1)m_1^* - \kappa_1m_2^*}{2(\delta_1 + \lambda_1 + \gamma_1 + \kappa_1)},\end{aligned}$$

and verify the first part in (27). From (30) we have

$$\begin{aligned}m_{s2}^* &= \frac{(\delta_2 + 2\lambda_2 + \kappa_2)n_2^*/P_2^* - \kappa_1n_1^*/P_2^* + 2\nu_2P_{22}^*/P_2^*}{\delta_2 + \lambda_2 + \gamma_2 + \kappa_2} \\ &= \frac{(\delta_2 + 2\lambda_2 + \kappa_2)m_2^* - \kappa_2m_1^* + 2\nu_2p_{22}^*}{\delta_2 + \lambda_2 + \gamma_2 + \kappa_2},\end{aligned}$$

and verify the second part in (27). The expression of  $p_{22}^* = P_{22}^*/P_2^*$  is derived from (16) and (31).  $\square$

### 2.3 The proof of Theorem 3

By (14) and (15), the ratio of mRNA copy number at steady-state in  $\mathbb{S}_2$  stage to that in  $\mathbb{S}_1$  stage is given by

$$r^* = \frac{m_2^*}{m_1^*} = \frac{\nu_1\lambda_1\kappa_2(\lambda_2 + \gamma_2 + \kappa_2) + 2\nu_2\lambda_2(\delta_1 + \kappa_1)(\lambda_1 + \gamma_1 + \kappa_1)}{\nu_1\lambda_1(\delta_2 + \kappa_2)(\lambda_2 + \gamma_2 + \kappa_2) + \nu_2\lambda_2\kappa_1(\lambda_1 + \gamma_1 + \kappa_1)}. \quad (35)$$

In order to emphasize the impact of the cell cycle stage transition on the variation of  $r^*$ , we consider the case that the transcription kinetics are unchanged in the two stages:

$$\nu_i = \nu, \quad \delta_i = \delta, \quad \lambda_i = \lambda, \quad \gamma_i = \gamma, \quad i = 1, 2. \quad (36)$$

When it holds, we can simplify (35) to the form

$$r^* = \frac{2(\delta + \kappa_1)(\lambda + \gamma + \kappa_1) + \kappa_2(\lambda + \gamma + \kappa_2)}{\kappa_1(\lambda + \gamma + \kappa_1) + (\delta + \kappa_2)(\lambda + \gamma + \kappa_2)}. \quad (37)$$

It is interesting to see that the fold change  $r^*$  in (37) depends on  $\lambda + \gamma$ , but not on  $\lambda$  and  $\gamma$  individually, and is independent of the synthesis rate  $\nu$ .



**Theorem 3** For any constant  $C > 0$ , there exist system parameters under the constraint (36) to make  $r^* = C$ .

**Proof** We prove the result by specifying the parameter sets to make  $r^* = C$  for  $C$  in different ranges. First, we consider the case that  $C \geq 2$ , and choose

$$\kappa_1 = C\kappa_2, \quad \lambda + \gamma = \kappa_2, \quad \delta = \frac{(C^3 - C^2 - 2)\kappa_2}{2}.$$

Note that  $\delta > 0$  since  $C \geq 2$  implies  $C^3 - C^2 - 2 \geq 2C^2 - C^2 - 2 \geq C^2 - 2 > 0$ . It follows from (37) that

$$\begin{aligned} r^* &= \frac{2[(C^3 - C^2 - 2)\kappa_2/2 + C\kappa_2](C\kappa_2 + \kappa_2) + 2\kappa_2^2}{C\kappa_2(C\kappa_2 + \kappa_2) + (2\kappa_2(C^3 - C^2 - 2)\kappa_2/2)} \\ &= \frac{[(C^3 - C^2 - 2) + 2C](C + 1)\kappa_2^2 + 2\kappa_2^2}{C(C + 1)\kappa_2^2 + (C^3 - C^2 - 2)\kappa_2^2} = C. \end{aligned}$$

When  $C \leq 1$ , we take

$$\lambda + \gamma = \kappa_1, \quad \kappa_2 = \frac{4\kappa_1}{C}, \quad \delta = \frac{(16 - 12C - 2C^3)\kappa_1}{C^3} > 0.$$

Substituting these parameters into (37), we have

$$\begin{aligned} r^* &= \frac{2[(16 - 12C - 2C^3)\kappa_1/C^3 + \kappa_1](\kappa_1 + \kappa_1) + 4\kappa_1 C \cdot (\kappa_1 + 4\kappa_1/C)}{\kappa_1(\kappa_1 + \kappa_1) + [(16 - 12C - 2C^3)\kappa_1/C^3 + 4\kappa_2/C](\kappa_1 + 4\kappa_1/C)} \\ &= \frac{4(16 - 12C - C^3)\kappa_1^2/C^3 + 4(C + 4)\kappa_1^2/C^2}{2\kappa_1^2 + (C + 4)(16 - 12C + 4C^2 - 2C^3)\kappa_1^2/C^4} = C. \end{aligned}$$

When  $C \in (3/2, 2)$ , we choose

$$\lambda + \gamma = \kappa_1 = \kappa_2, \quad \delta = \frac{(2C - 3)\kappa_2}{2 - C} > 0.$$

By (37), we derive

$$r^* = \frac{2[(2C - 3)\kappa_2/(2 - C) + \kappa_2] \cdot 2\kappa_2 + 2\kappa_2^2}{2\kappa_2^2 + [(2C - 3)\kappa_2/(2 - C) + \kappa_2] \cdot 2\kappa_2} = C.$$

Finally, we consider the case that  $C \in (1, 3/2]$ , and choose

$$\lambda + \gamma = 2\kappa_2, \quad \kappa_1 = (C - 1)\kappa_2, \quad \delta = \frac{(C - 1)(C^2 - C + 1)\kappa_2}{2 - C} > 0.$$

By (37), we derive

$$r^* = \frac{2[(C - 1)(C^2 - C + 1)\kappa_2/(2 - C) + (C - 1)\kappa_2] \cdot (C + 1)\kappa_2 + 3\kappa_2^2}{(C - 1)\kappa_2 \cdot (C + 1)\kappa_2 + [(C - 1)(C^2 - C + 1)\kappa_2/(2 - C) + \kappa_2] \cdot 3\kappa_2} = C. \quad \square$$

## 2.4 The proof of Theorem 4

**Theorem 4** *Let (36) hold. Then we have*

(a) *When  $\kappa_1$  increases from 0 to  $\infty$ ,  $r^*$  increases from  $r^*(0, \kappa_2) < 2$  until it peaks uniquely and then decreases to approach 2 at  $\infty$ . In particular,  $r^* > 2$  if and only if*

$$\kappa_1 > \kappa_2 + \frac{\kappa_2(\kappa_2 + \lambda + \gamma)}{2\delta}. \quad (38)$$

(b) *When  $\kappa_2$  increases from 0 to  $\infty$ ,  $r^*$  decreases from  $r^*(\kappa_1, 0) > 2$  until it bottoms out uniquely and then increases to approach 1 at  $\infty$ . In particular,  $r^* < 1$  if and only if*

$$\kappa_2 > 2\kappa_1 + \lambda + \gamma + \frac{\kappa_1(\lambda + \gamma + \kappa_1)}{\delta}. \quad (39)$$

(c) *When  $\kappa_1 \leq \kappa_2$ ,  $r^*$  has an upper bound strictly less than 2.*

**Proof** (a). From (37) we find

$$\begin{aligned} r^*(0, \kappa_2) &= \frac{2\delta(\lambda + \gamma) + \kappa_2(\lambda + \gamma + \kappa_2)}{(\delta + \kappa_2)(\lambda + \gamma + \kappa_2)} \\ &= \frac{2(\delta + \kappa_2)(\lambda + \gamma + \kappa_2) - \kappa_2(2\delta + \lambda + \gamma + \kappa_2)}{(\delta + \kappa_2)(\lambda + \gamma + \kappa_2)} \\ &= 2 - \frac{\kappa_2(2\delta + \lambda + \gamma + \kappa_2)}{(\delta + \kappa_2)(\lambda + \gamma + \kappa_2)} < 2. \end{aligned}$$

Differentiating (37) with respect to  $\kappa_1$  gives

$$\frac{\partial r^*(\kappa_1, \kappa_2)}{\partial \kappa_1} = \frac{-2\delta(\lambda + \gamma + \kappa_1)^2 + (\lambda + \gamma + \kappa_2)[2\delta(\lambda + \gamma + 2\kappa_1 + \kappa_2 + \delta) + \kappa_2(\lambda + \gamma + 2\kappa_1)]}{[\kappa_1(\lambda + \gamma + \kappa_1) + (\delta + \kappa_2)(\lambda + \gamma + \kappa_2)]^2}.$$

For convenience, we write its numerator as  $h(\kappa_1)$  for a moment. Then

$$h(0) = \kappa_2(\lambda + \gamma)(2\delta + \lambda + \gamma + \kappa_2) + 2\delta(\delta + \kappa_2)(\lambda + \gamma + \kappa_2) > 0,$$

indicating that  $r^*$  increases for small  $\kappa_1 > 0$ . Since  $h(\kappa_1)$  is a quadratic function of  $\kappa_1$  with the leading coefficient  $-2\delta < 0$  and  $h(0) > 0$ , it vanishes exactly once in  $(0, \infty)$ , at which  $r^*$  peaks uniquely, and after which  $r^*$  decreases and tends to its limit 2 at  $\infty$ .

To verify the last part, we note that  $r^* > 2$  if and only if

$$\begin{aligned} &2(\delta + \kappa_1)(\lambda + \gamma + \kappa_1) + \kappa_2(\lambda + \gamma + \kappa_2) - 2\kappa_1(\lambda + \gamma + \kappa_1) - 2(\delta + \kappa_2)(\lambda + \gamma + \kappa_2) \\ &= 2\delta(\lambda + \gamma + \kappa_1) - (2\delta + \kappa_2)(\lambda + \gamma + \kappa_2) \\ &= [2\delta\kappa_1 - 2\delta\kappa_2 - \kappa_2(\lambda + \gamma + \kappa_2)] > 0. \end{aligned}$$

Clearly, it is equivalent to (38).

(b). By using a similar argument as in the proof of (a), we can show that  $r^*(\kappa_1, 0) > 2$ . Differentiating (37) with respect to  $\kappa_2$  gives

$$\frac{\partial r^*(\kappa_1, \kappa_2)}{\partial \kappa_2} = \frac{\delta(\lambda + \gamma + \kappa_2)^2 - (2\delta + \kappa_1)(\lambda + \gamma + 2\kappa_2)(\lambda + \gamma + \kappa_1) - 2\delta(\delta + \kappa_1)(\lambda + \gamma + \kappa_1)}{[\kappa_1(\lambda + \gamma + \kappa_1) + (\delta + \kappa_2)(\lambda + \gamma + \kappa_2)]^2}.$$

Let  $g(\kappa_2)$  denote its numerator for a moment. Then

$$g(0) = -(\delta + \kappa_1)(\lambda + \gamma)^2 - \kappa_1(\lambda + \gamma)(2\delta + \kappa_1) - 2\delta(\delta + \kappa_1)(\lambda + \gamma + \kappa_1) < 0,$$

indicating that  $r^*$  decreases for  $\kappa_2 > 0$  small. Since the quadratic function  $g(\kappa_2)$  has the leading coefficient  $\delta > 0$  and  $g(0) < 0$ , it vanishes exactly once in  $(0, +\infty)$ , at which  $r^*$  bottoms out uniquely, and after which  $r^*$  increases and tends to its limit 1 at infinity. Finally,  $r^* < 1$  is equivalent to

$$\begin{aligned} & 2(\delta + \kappa_1)(\lambda + \gamma + \kappa_1) + \kappa_2(\lambda + \gamma + \kappa_2) - \kappa_1(\lambda + \gamma + \kappa_1) - (\delta + \kappa_2)(\lambda + \gamma + \kappa_2) \\ &= (2\delta + \kappa_1)(\lambda + \gamma + \kappa_1) - \delta(\lambda + \gamma + \kappa_2) \\ &= \delta(\lambda + \gamma) + \kappa_1(2\delta + \lambda + \gamma + \kappa_1) - \delta\kappa_2 < 0. \end{aligned}$$

(c). From the proof of (a),

$$\begin{aligned} h(\kappa_1) &= -2\delta(\lambda + \gamma + \kappa_1)^2 + (\lambda + \gamma + \kappa_2)[2\delta(\lambda + \gamma + 2\kappa_1 + \kappa_2 + \delta) + \kappa_2(\lambda + \gamma + 2\kappa_1)] \\ &\geq -2\delta(\lambda + \gamma + \kappa_1)^2 + (\lambda + \gamma + \kappa_2) \cdot 2\delta(\lambda + \gamma + 2\kappa_1 + \kappa_2 + \delta) \\ &= 2\delta(\kappa_2 - \kappa_1)(\lambda + \gamma + \kappa_1) + 2\delta(\lambda + \gamma + \kappa_2)(\kappa_1 + \kappa_2 + \delta) > 0 \end{aligned}$$

holds for all  $\kappa_1 \leq \kappa_2$ . Thus  $r^*$  increases in  $(0, \kappa_2)$ , indicating that

$$r^*(\kappa_1, \kappa_2) \leq r^*(\kappa_2, \kappa_2) = \frac{2\delta + 3\kappa_2}{\delta + 2\kappa_2} < 2.$$

The proof is completed.  $\square$
